# Supplementary material for: Precursors of Dancing and Singing to Music in Three- to Four-Months-Old Infants
Source: PubMed Central journal article supplement (PMC4023986; doi:10.1371/journal.pone.0097680), 2014-05-16
Supplement: pone.0097680.s003.pdf [file pone.0097680.s003.pdf]

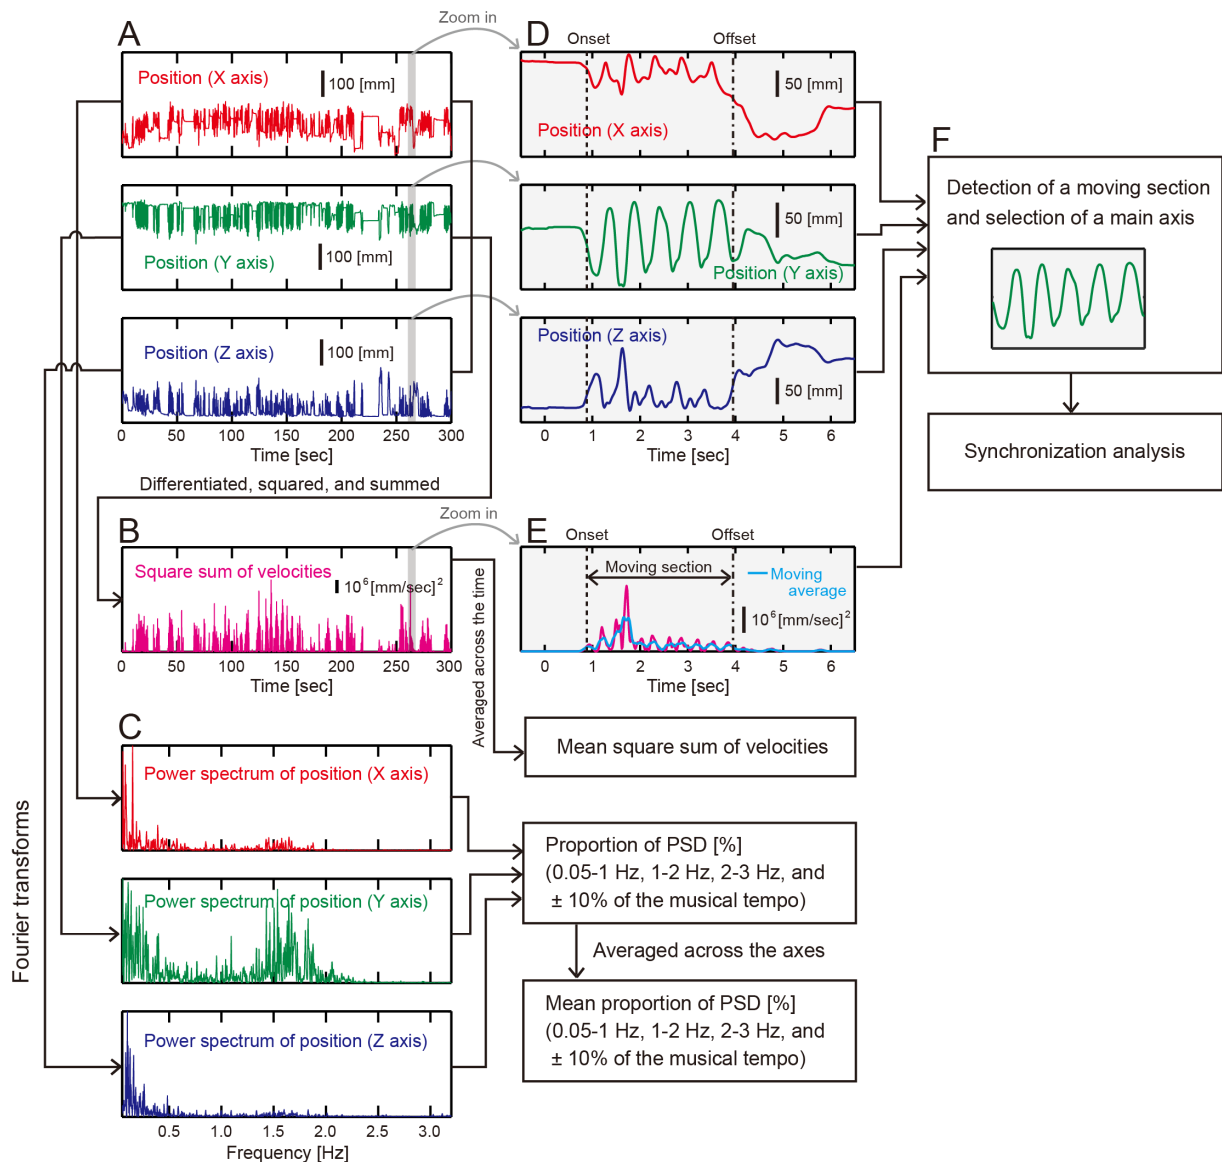

**Figure S3.** Schematic overview of our pipeline for analysis of limb movements. (A) Position data of the right leg of ID1 infant along X- (red), Y- (green), and Z-coordinate axis (blue) during the music condition “Everybody” by The Backstreet Boys. The data shown are after the filtering with the 4th-order Butterworth low-pass filter at a cutoff frequency of 10 Hz. (B) Square sum of the velocity was calculated from the smoothed position data. The mean square sum of velocity across the time was calculated as a measure of movement amount. (C) We submitted the smoothed position data multiplied by Hanning window to Fourier transforms. We calculated proportions of the power spectrum density (PSD) within the frequency ranges of 0.05-1, 1-2, 2-3 Hz, and  $\pm 10\%$  of the musical tempo relative to the total PSD above 0.05 Hz. We averaged each of the measures across the X-, Y-, and Z- axes to investigate the frequency component of the infant’s movement. (D, E) Period of time in which the infant moved longer than 3 s (called as a *moving section*) was detected by defining a movement onset and an offset from the 10-points moving-averaged signal (cyan) of the square sum of velocity (magenta). (F) We selected a main axis along which the infant moved most intensely by determining the largest square sum of velocity among the X-, Y-, and Z- axes in the moving section (Y axis was selected in this case). The data was then used for the synchronization analysis (Figure 2 and Methods for detail).
