# Supplementary material for: Precursors of Dancing and Singing to Music in Three- to Four-Months-Old Infants
Source: PubMed Central journal article supplement (PMC4023986; doi:10.1371/journal.pone.0097680), 2014-05-16
Supplement: pone.0097680.s007.pdf [file pone.0097680.s007.pdf]

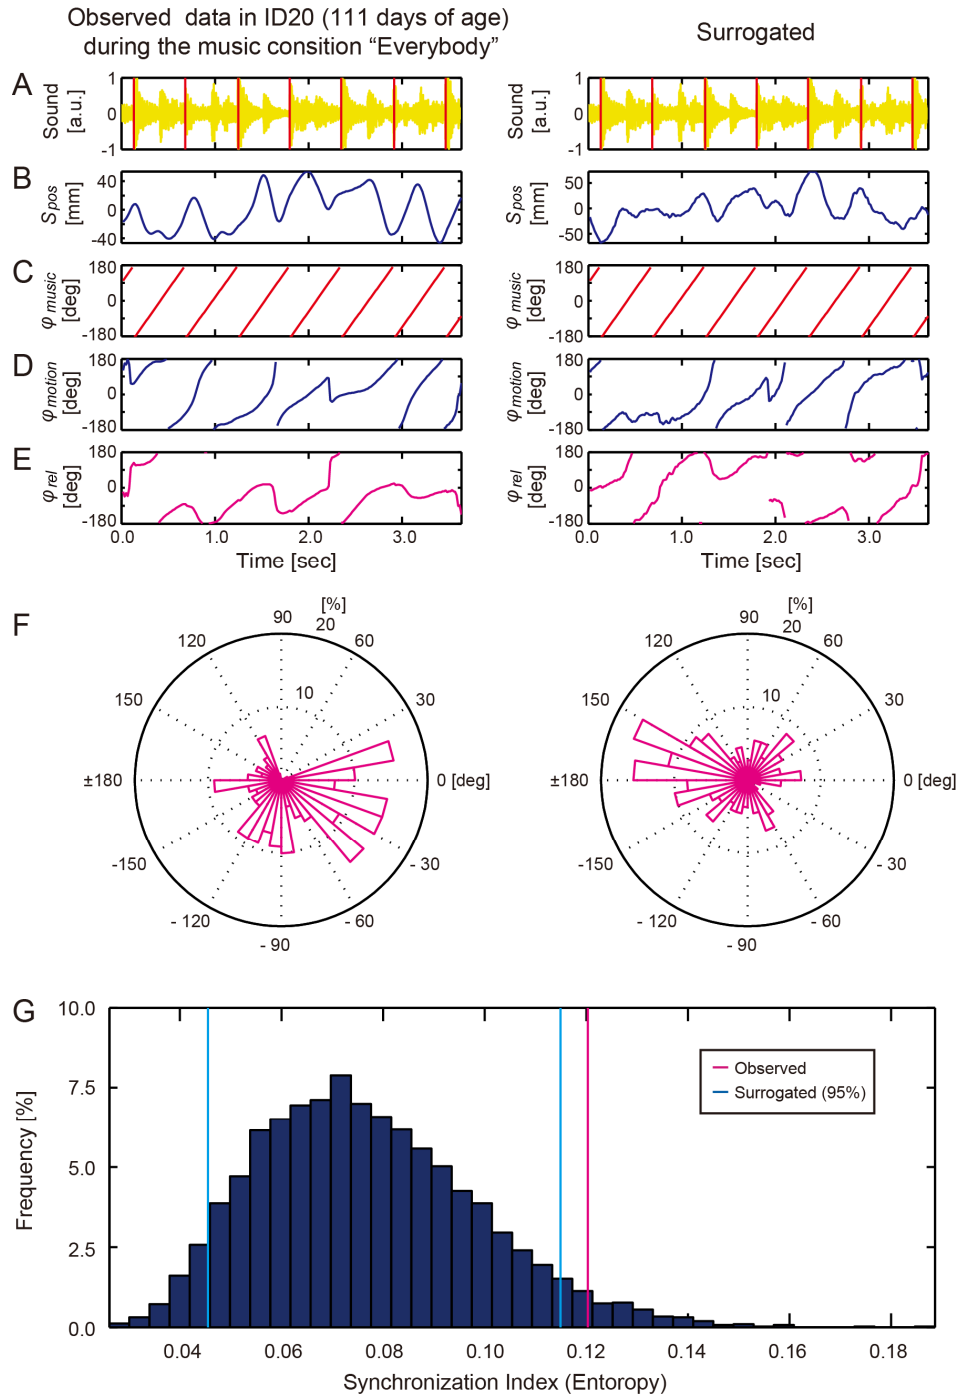

**Figure S7.** Significant synchronization in right leg movements of ID20 during the music condition "Everybody" (108.7 BPM). **(A)** Sound wave of the auditory stimulus (yellow) with the detected beat onsets (red vertical lines). **(B)** Observed (left) and phase-randomized (right) position data  $s_{pos}(t)$  along the X coordinate within a moving section. **(C)** Instantaneous phase of the musical beat  $\phi_{music}(t)$  calculated from the detected beat onsets. **(D)** Instantaneous phase of the motion  $\phi_{motion}(t)$ . **(E)** Relative phase  $\phi_{rel}(t)$  between motion and the musical beat. **(F)** Circular histograms of  $\phi_{rel}(t)$ . **(G)** Monte-Carlo statistics showed that the observed synchronization index (magenta line) was above the 95% confidence interval of the surrogate synchronization indexes (blue lines) calculated from the 10,000 phase-randomized position data.
