# Supplementary material for: Precursors of Dancing and Singing to Music in Three- to Four-Months-Old Infants
Source: PubMed Central journal article supplement (PMC4023986; doi:10.1371/journal.pone.0097680), 2014-05-16
Supplement: pone.0097680.s008.pdf [file pone.0097680.s008.pdf]

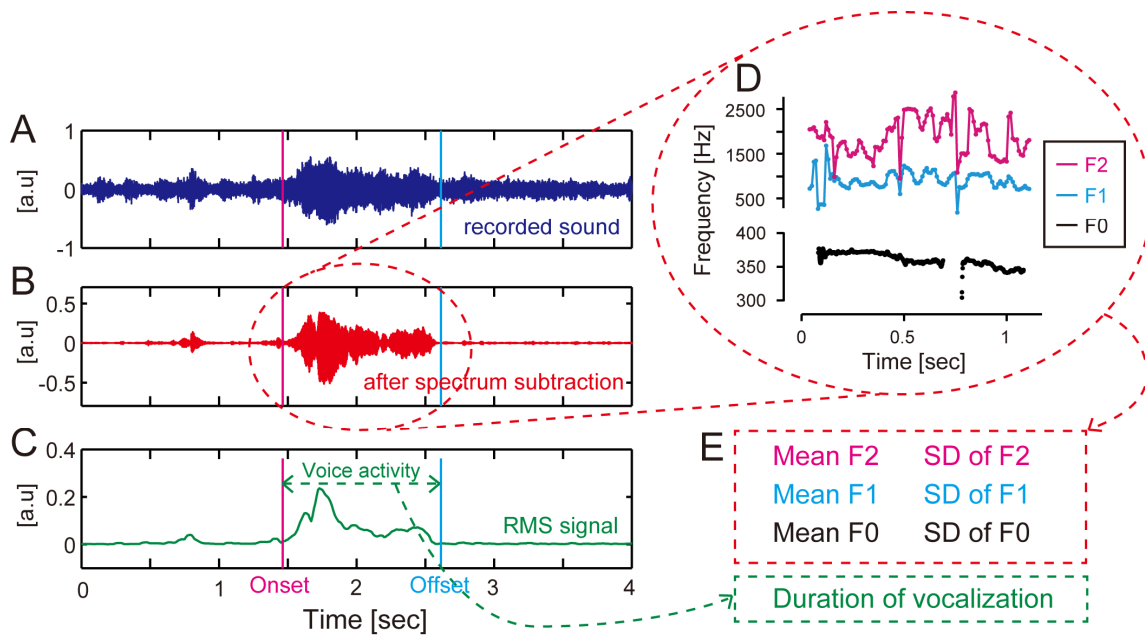

**Figure S8.** Schematic overview of our pipeline for analysis of vocalizations. **(A)** A recorded sound data extracted from the SONY digital video camera during the music condition playing “Everybody” by the Backstreet Boys (sampling rate = 36,000 Hz). Not only the infant’s voice but also the musical stimulus was included in the background. **(B)** We performed a spectrum subtraction to extract the infant’s vocalization from the recorded sound in the music condition. **(C)** We calculated root mean square (RMS) from the spectrum-subtracted signal with the time window of 0.1 s (3,600 data points) and with a time step of 0.01 s (360 data points). Voice activity detection was performed with a threshold of 50 dB (Eq. 10 in Methods). **(D)** The fundamental frequency ( $F_0$ ) was extracted for each detected voice using STRAIGHT. The formant frequencies ( $F_1$  and  $F_2$ ) were calculated based on a 14th-order Linear Predictive Coding (LPC) algorithm using Praat (<http://www.praat.org/>). **(E)** We calculated the mean and standard deviation (SD) of  $F_0$ ,  $F_1$ , and  $F_2$  within an utterance for each of the detected areas. We also calculated mean duration of the vocalization per minute.
