# Supplementary material for: Precursors of Dancing and Singing to Music in Three- to Four-Months-Old Infants
Source: PubMed Central journal article supplement (PMC4023986; doi:10.1371/journal.pone.0097680), 2014-05-16
Supplement: pone.0097680.s009.pdf [file pone.0097680.s009.pdf]

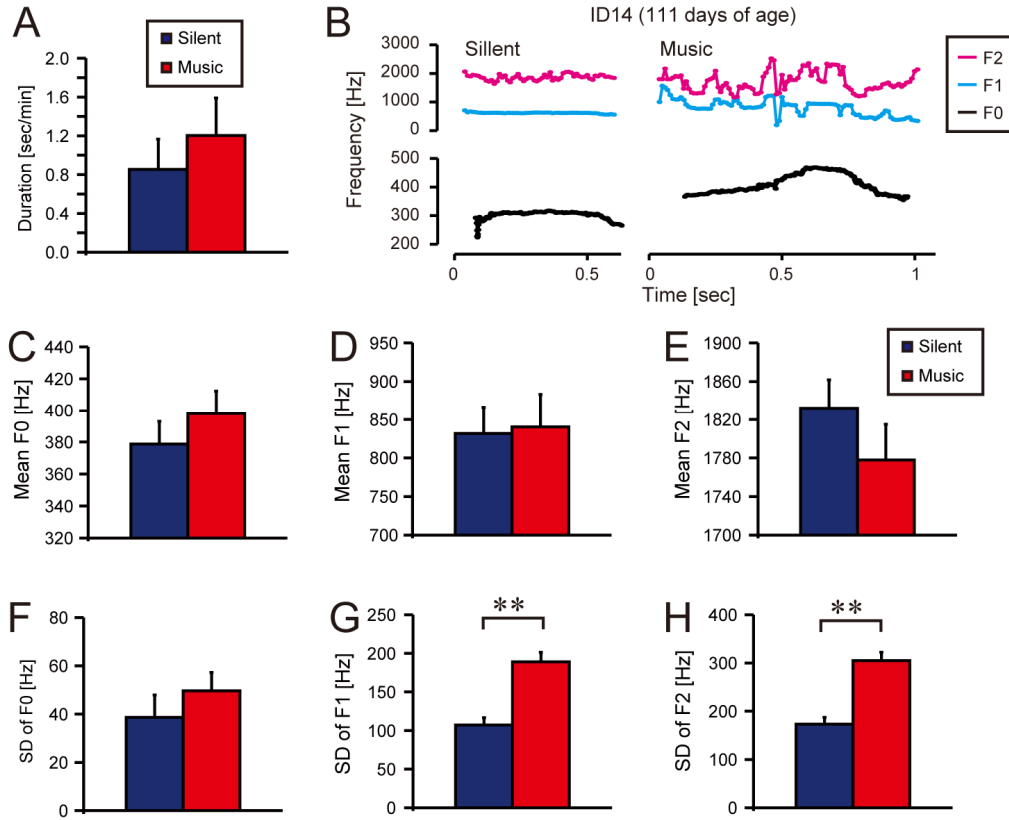

**Figure S9.** Spontaneous vocalizations of infants during the music condition “Everybody” by Backstreet Boys and during the silent condition. Error bars indicate standard error (SE) between participants. **(A)** No significant difference was found in the mean duration of vocalizations per minute between the silent and music conditions (Wilcoxon signed-rank test,  $Z = 1.08$ ,  $P = 0.28$ ). **(B)** Typical time series of fundamental ( $F_0$ , black lines) and formant frequencies ( $F_1$  and  $F_2$ , cyan and magenta lines, respectively) within utterances. **(C-F)** There were no significant differences between the silent and music conditions (mean  $F_0$ ,  $Z = 0.93$ ,  $p = 0.35$ ; mean  $F_1$ ,  $Z = 0.31$ ,  $p = 0.76$ ; mean  $F_2$ ,  $Z = 1.34$ ,  $p = 0.18$ ; SD of  $F_0$ ,  $Z = 1.45$ ,  $p = 0.15$ , respectively). **(G, H)** SD of  $F_1$  and  $F_2$  were significantly higher in the music condition than in the silent condition ( $Z = 3.31$ ,  $**p < 0.001$ ;  $Z = 3.41$ ,  $**p < 0.001$ , respectively).
