# Supplementary material for: Precursors of Dancing and Singing to Music in Three- to Four-Months-Old Infants
Source: PubMed Central journal article supplement (PMC4023986; doi:10.1371/journal.pone.0097680), 2014-05-16
Supplement: pone.0097680.s010.pdf [file pone.0097680.s010.pdf]

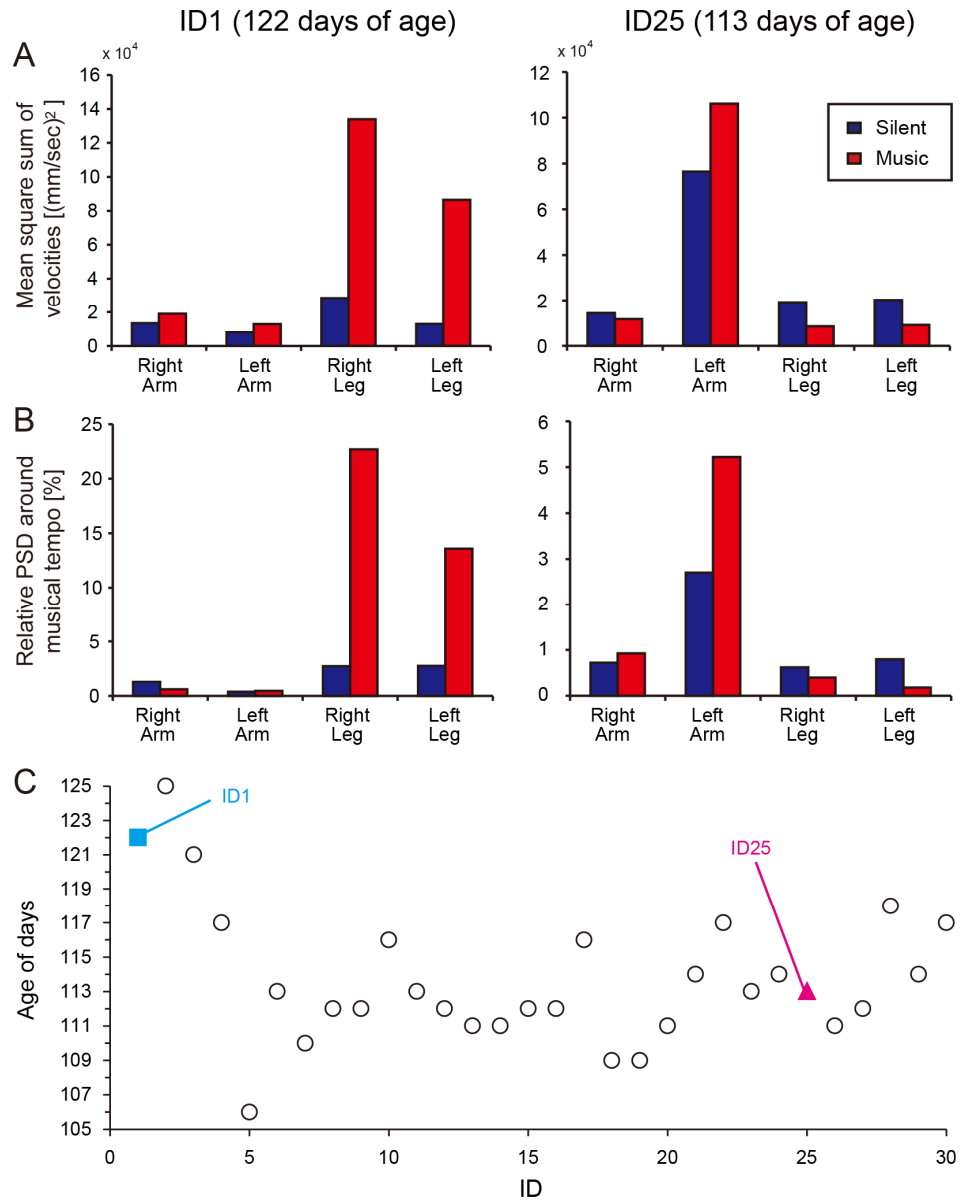

**Figure S10.** Further analyses for ID1 and ID25. **(A)** Mean square sum of velocities and **(B)** relative proportions of the power spectrum density (PSD) around the musical tempo along the Y coordinate axis in the music condition playing “Everybody” by The Backstreet Boys (red bars) and silent condition (blue bars) in ID1 and ID25. **(C)** Age of days in ID1 and ID25 in comparison with the other infants.
