# Supplementary material for: Precursors of Dancing and Singing to Music in Three- to Four-Months-Old Infants
Source: PubMed Central journal article supplement (PMC4023986; doi:10.1371/journal.pone.0097680), 2014-05-16
Supplement: pone.0097680.s015.pdf [file pone.0097680.s015.pdf]

**Table S1. Infant profiles and the number of synchronized movements to the musical beat during the music condition “Everybody” by Backstreet Boys and the silent condition.**

| Profile   |     |                        |            | Data                    |        | The number of synchronized movements with the musical beat |       |          |       |           |        |          |       |
|-----------|-----|------------------------|------------|-------------------------|--------|------------------------------------------------------------|-------|----------|-------|-----------|--------|----------|-------|
| ID        | Sex | Age [days]             | Weight [g] | Recorded Duration [sec] |        | Right Arm                                                  |       | Left Arm |       | Right Leg |        | Left Leg |       |
|           |     |                        |            | Silent                  | Music  | Silent                                                     | Music | Silent   | Music | Silent    | Music  | Silent   | Music |
| ID1       | M   | 122 (124) <sup>a</sup> | 3,270      | 80.00                   | 300.00 | 0 (0) <sup>b</sup>                                         | 0 (0) | 0 (0)    | 0 (0) | 0 (0)     | 2(14)  | 0 (0)    | 0 (1) |
| ID2       | F   | 125 (119)              | 2,570      | 80.00                   | 300.00 | 0 (0)                                                      | 0 (0) | 0 (0)    | 0 (0) | 0 (0)     | 0 (0)  | 0 (0)    | 0 (0) |
| ID3       | M   | 121 (110)              | 3,274      | 80.00                   | 300.00 | 0 (1)                                                      | 0 (1) | 0 (0)    | 0 (0) | 0 (0)     | 0 (0)  | 0 (0)    | 0 (0) |
| ID4       | F   | 117 (105)              | 2,888      | 393.00                  | 294.30 | 0 (0)                                                      | 0 (0) | 0 (0)    | 0 (0) | 0 (0)     | 0 (0)  | 0 (0)    | 0 (0) |
| ID7       | F   | 110 (92)               | 2,196      | 60.03                   | 290.00 | 0 (0)                                                      | 0 (0) | 0 (0)    | 0 (0) | 0 (0)     | 0 (0)  | 0 (0)    | 0 (0) |
| ID8       | F   | 112 (119)              | 3,138      | 196.87                  | 290.00 | 0 (0)                                                      | 0 (0) | 0 (0)    | 0 (0) | 0 (0)     | 0 (0)  | 0 (0)    | 0 (0) |
| ID9       | M   | 112 (93)               | 2,600      | 300.57                  | 290.00 | 0 (0)                                                      | 0 (0) | 0 (0)    | 0 (0) | 0 (0)     | 0 (0)  | 0 (1)    | 0 (1) |
| ID10      | M   | 116 (116)              | 2,800      | 180.45                  | 290.00 | 0 (0)                                                      | 0 (0) | 0 (0)    | 0 (0) | 0 (0)     | 0 (0)  | 0 (0)    | 0 (0) |
| ID13      | M   | 111 (116)              | 3,268      | 221.52                  | 290.00 | 0 (0)                                                      | 0 (0) | 0 (0)    | 0 (0) | 0 (0)     | 0 (0)  | 0 (0)    | 0 (0) |
| ID14      | M   | 111 (123)              | 3,915      | 190.15                  | 290.00 | 0 (0)                                                      | 0 (0) | 0 (0)    | 0 (0) | 0 (0)     | 0 (0)  | 0 (0)    | 0 (0) |
| ID15      | M   | 112 (107)              | 2,950      | 130.53                  | 290.00 | 0 (0)                                                      | 0 (0) | 0 (0)    | 0 (0) | 0 (0)     | 0 (0)  | 0 (0)    | 0 (0) |
| ID16      | M   | 112 (115)              | 3,005      | 123.17                  | 290.00 | 0 (0)                                                      | 0 (0) | 0 (0)    | 0 (0) | 0 (0)     | 0 (0)  | 0 (0)    | 0 (0) |
| ID17      | F   | 116 (120)              | 2,856      | 140.92                  | 290.00 | 0 (0)                                                      | 0 (0) | 0 (0)    | 0 (0) | 0 (0)     | 0 (0)  | 0 (0)    | 0 (0) |
| ID18      | M   | 109 (112)              | 2,736      | 130.62                  | 290.00 | 0 (0)                                                      | 0 (0) | 0 (0)    | 0 (0) | 0 (0)     | 0 (0)  | 0 (0)    | 0 (0) |
| ID19      | F   | 109 (111)              | 3,150      | 135.83                  | 290.00 | 0 (0)                                                      | 0 (0) | 0 (0)    | 0 (0) | 0 (0)     | 0 (0)  | 0 (0)    | 0 (0) |
| ID20      | F   | 111 (116)              | 2,770      | 130.13                  | 290.00 | 0 (0)                                                      | 0 (0) | 0 (0)    | 0 (0) | 0 (0)     | 1 (1)  | 0 (0)    | 0 (0) |
| ID21      | M   | 114 (106)              | 2,678      | 130.27                  | 290.00 | 0 (1)                                                      | 0 (0) | 0 (0)    | 0 (0) | 0 (0)     | 0 (0)  | 0 (4)    | 0 (0) |
| ID22      | M   | 117 (110)              | 3,143      | 130.38                  | 290.00 | 0 (0)                                                      | 0 (0) | 0 (1)    | 0 (0) | 0 (0)     | 0 (0)  | 0 (0)    | 0 (0) |
| ID23      | F   | 113 (117)              | 3,245      | 130.32                  | 290.00 | 0 (0)                                                      | 0 (0) | 0 (0)    | 0 (0) | 0 (1)     | 0 (0)  | 0 (0)    | 0 (0) |
| ID24      | F   | 114 (115)              | 4,030      | 134.35                  | 290.00 | 0 (0)                                                      | 0 (0) | 0 (0)    | 0 (0) | 0 (0)     | 0 (0)  | 0 (0)    | 0 (0) |
| ID25      | F   | 113 (118)              | 3,534      | 130.52                  | 290.00 | 0 (0)                                                      | 0 (0) | 0 (4)    | 1 (3) | 0 (0)     | 0 (0)  | 0 (0)    | 0 (0) |
| ID26      | M   | 111 (90)               | 3,628      | 130.37                  | 290.00 | 0 (0)                                                      | 0 (0) | 0 (0)    | 0 (1) | 0 (0)     | 0 (0)  | 0 (0)    | 0 (1) |
| ID27      | F   | 112 (117)              | 2,875      | 130.75                  | 290.00 | 0 (0)                                                      | 0 (0) | 0 (0)    | 0 (0) | 0 (0)     | 0 (0)  | 0 (0)    | 0 (0) |
| ID28      | M   | 118 (107)              | 2,948      | 130.78                  | 290.00 | 0 (0)                                                      | 0 (0) | 0 (0)    | 0 (0) | 0 (0)     | 0 (0)  | 0 (0)    | 0 (0) |
| ID29      | M   | 114 (112)              | 2,790      | 130.43                  | 290.00 | 0 (0)                                                      | 0 (0) | 0 (0)    | 0 (0) | 0 (0)     | 0 (0)  | 0 (0)    | 0 (0) |
| ID30      | M   | 117 (116)              | 2,900      | 130.72                  | 290.00 | 0 (0)                                                      | 0 (0) | 0 (0)    | 0 (0) | 0 (0)     | 0 (0)  | 0 (0)    | 0 (0) |
| Mean      |     | 114 (112)              | 3,045      | 149.33                  | 291.32 |                                                            |       |          |       |           |        |          |       |
| Summation |     |                        |            |                         |        | 0 (2)                                                      | 0 (1) | 0 (5)    | 1 (4) | 0 (1)     | 3 (15) | 0 (5)    | 0 (3) |

F: Female, M: Male. <sup>a</sup>The number in parentheses represents corrected age of days calculated from the expected birthday. <sup>b</sup>The number in parentheses represents the detected number of intervals during which infants continuously moved for more than three seconds called as *moving sections*. In the silent condition, synchronization was assessed by using a “virtual” musical beat extracted from the auditory stimulus in the music condition (Methods for detail). The data from ID1 and ID25 are high-lighted in yellow.
