# Supplementary material for: Precursors of Dancing and Singing to Music in Three- to Four-Months-Old Infants
Source: PubMed Central journal article supplement (PMC4023986; doi:10.1371/journal.pone.0097680), 2014-05-16
Supplement: pone.0097680.s016.pdf [file pone.0097680.s016.pdf]

**Table S2. Infant profiles and the number of synchronized movements to the musical beat during the music condition “Go Trippy” by WANICO feat. Jake Smith and the silent condition.**

| Profile     |          |                        |              | Data                    |               | The number of synchronized movements with the musical beat |              |              |              |              |              |              |              |
|-------------|----------|------------------------|--------------|-------------------------|---------------|------------------------------------------------------------|--------------|--------------|--------------|--------------|--------------|--------------|--------------|
| ID          | Sex      | Age [days]             | Weight [g]   | Recorded Duration [sec] |               | Right Arm                                                  |              | Left Arm     |              | Right Leg    |              | Left Leg     |              |
|             |          |                        |              | Silent                  | Music         | Silent                                                     | Music        | Silent       | Music        | Silent       | Music        | Silent       | Music        |
| ID4         | F        | 117 (105) <sup>a</sup> | 2,888        | 393.00                  | 268.00        | 0 (0) <sup>b</sup>                                         | 0 (0)        | 0 (0)        | 0 (0)        | 0 (0)        | 0 (0)        | 0 (0)        | 0 (0)        |
| ID5         | M        | 106 (107)              | 3,102        | 130.27                  | 268.00        | 0 (0)                                                      | 0 (0)        | 0 (0)        | 0 (0)        | 0 (0)        | 0 (0)        | 0 (0)        | 0 (0)        |
| ID6         | M        | 113 (104)              | 2,628        | 123.48                  | 281.40        | 0 (0)                                                      | 0 (0)        | 0 (0)        | 0 (0)        | 0 (0)        | 0 (0)        | 0 (0)        | 0 (0)        |
| ID7         | F        | 110 (92)               | 2,196        | 60.03                   | 268.00        | 0 (0)                                                      | 0 (0)        | 0 (0)        | 0 (0)        | 0 (0)        | 0 (0)        | 0 (0)        | 0 (0)        |
| ID8         | F        | 112 (119)              | 3,138        | 196.87                  | 268.00        | 0 (0)                                                      | 0 (0)        | 0 (0)        | 0 (0)        | 0 (0)        | 0 (0)        | 0 (0)        | 0 (0)        |
| ID9         | M        | 112 (93)               | 2,600        | 300.57                  | 268.00        | 0 (0)                                                      | 0 (0)        | 0 (0)        | 0 (0)        | 0 (0)        | 0 (0)        | 0 (1)        | 0 (0)        |
| ID10        | M        | 116 (116)              | 2,800        | 180.45                  | 268.00        | 0 (0)                                                      | 0 (1)        | 0 (0)        | 0 (0)        | 0 (0)        | 0 (0)        | 0 (0)        | 0 (0)        |
| ID11        | M        | 113 (114)              | 3,310        | 218.22                  | 268.00        | 0 (0)                                                      | 0 (0)        | 0 (0)        | 0 (0)        | 0 (0)        | 0 (0)        | 0 (0)        | 0 (0)        |
| ID12        | F        | 112 (124)              | 2,948        | 190.42                  | 268.00        | 0 (0)                                                      | 0 (0)        | 0 (0)        | 0 (0)        | 0 (0)        | 0 (0)        | 0 (0)        | 0 (0)        |
| ID13        | M        | 111 (116)              | 3,268        | 221.52                  | 268.00        | 0 (0)                                                      | 0 (0)        | 0 (0)        | 0 (0)        | 0 (0)        | 0 (1)        | 0 (0)        | 0 (0)        |
| ID14        | M        | 111 (123)              | 3,915        | 190.15                  | 268.00        | 0 (0)                                                      | 0 (0)        | 0 (0)        | 0 (0)        | 0 (0)        | 0 (0)        | 0 (0)        | 0 (0)        |
| ID16        | M        | 112 (115)              | 3,005        | 123.17                  | 268.00        | 0 (0)                                                      | 0 (0)        | 0 (0)        | 0 (0)        | 0 (0)        | 0 (0)        | 0 (0)        | 0 (0)        |
| ID18        | M        | 109 (112)              | 2,736        | 130.62                  | 268.00        | 0 (0)                                                      | 0 (0)        | 0 (0)        | 0 (0)        | 0 (0)        | 0 (0)        | 0 (0)        | 0 (0)        |
| ID20        | F        | 111 (116)              | 2,770        | 130.13                  | 268.00        | 0 (0)                                                      | 0 (0)        | 0 (0)        | 0 (0)        | 0 (0)        | 0 (0)        | 0 (0)        | 0 (0)        |
| ID21        | M        | 114 (106)              | 2,678        | 130.27                  | 268.00        | 0 (1)                                                      | 0 (0)        | 0 (0)        | 0 (0)        | 0 (0)        | 0 (0)        | 0 (4)        | 0 (0)        |
| ID22        | M        | 117 (110)              | 3,143        | 130.38                  | 268.00        | 0 (0)                                                      | 0 (0)        | 0 (1)        | 0 (0)        | 0 (0)        | 0 (0)        | 0 (0)        | 0 (0)        |
| ID24        | F        | 114 (115)              | 4,030        | 134.35                  | 268.00        | 0 (0)                                                      | 0 (0)        | 0 (0)        | 0 (0)        | 0 (0)        | 0 (0)        | 0 (0)        | 0 (0)        |
| <b>ID25</b> | <b>F</b> | <b>113 (118)</b>       | <b>3,534</b> | <b>130.52</b>           | <b>268.00</b> | <b>0 (0)</b>                                               | <b>0 (0)</b> | <b>0 (4)</b> | <b>0 (2)</b> | <b>0 (0)</b> | <b>0 (0)</b> | <b>0 (0)</b> | <b>0 (0)</b> |
| ID26        | M        | 111 (90)               | 3,628        | 130.37                  | 268.00        | 0 (0)                                                      | 0 (0)        | 0 (0)        | 0 (0)        | 0 (0)        | 0 (0)        | 0 (0)        | 0 (0)        |
| ID27        | F        | 112 (117)              | 2,875        | 130.75                  | 268.00        | 0 (0)                                                      | 0 (0)        | 0 (0)        | 0 (0)        | 0 (0)        | 0 (0)        | 0 (0)        | 0 (0)        |
| ID28        | M        | 118 (107)              | 2,948        | 130.78                  | 268.00        | 0 (0)                                                      | 0 (0)        | 0 (0)        | 0 (0)        | 0 (0)        | 0 (0)        | 0 (0)        | 0 (0)        |
| ID29        | M        | 114 (112)              | 2,790        | 130.43                  | 268.00        | 0 (0)                                                      | 0 (0)        | 0 (0)        | 0 (0)        | 0 (0)        | 0 (0)        | 0 (0)        | 0 (0)        |
| ID30        | M        | 117 (116)              | 2,900        | 130.72                  | 268.00        | 0 (0)                                                      | 0 (0)        | 0 (0)        | 0 (0)        | 0 (0)        | 0 (0)        | 0 (0)        | 0 (0)        |
| Mean        |          | 113 (111)              | 3,036        | 163.80                  | 268.58        |                                                            |              |              |              |              |              |              |              |
| Summation   |          |                        |              |                         |               | 0 (1)                                                      | 0 (1)        | 0 (5)        | 0 (2)        | 0 (0)        | 0 (1)        | 0 (5)        | 0 (0)        |

F: Female, M: Male. <sup>a</sup>The number in parentheses represents corrected age of days calculated from the expected birthday. <sup>b</sup>The number in parentheses represents the detected number of intervals during which infants continuously moved for more than three seconds called as *moving sections*. In the silent condition, synchronization was assessed by using a “virtual” musical beat extracted from the auditory stimulus in the music condition (Methods for detail). The data from ID25 is high-lighted in yellow.
