# Supplementary material for: Precursors of Dancing and Singing to Music in Three- to Four-Months-Old Infants
Source: PubMed Central journal article supplement (PMC4023986; doi:10.1371/journal.pone.0097680), 2014-05-16
Supplement: pone.0097680.s017.pdf [file pone.0097680.s017.pdf]

**Table S3. Correlation between the age of days and the behavioral measures during the music condition “Everybody” by Backstreet Boys and the silent condition**

| Measures                     | Condition |                |       |                |
|------------------------------|-----------|----------------|-------|----------------|
|                              | Silent    |                | Music |                |
|                              | rho       | <i>p</i> value | rho   | <i>p</i> value |
| Limb-movement measures       |           |                |       |                |
| Mean square sum of velocity  |           |                |       |                |
| Right Arm                    | 0.05      | 0.80           | 0.23  | 0.26           |
| Left Arm                     | -0.07     | 0.72           | 0.18  | 0.38           |
| Right Leg                    | 0.14      | 0.51           | 0.21  | 0.29           |
| Left Leg                     | -0.02     | 0.92           | 0.31  | 0.12           |
| PSD around the musical tempo |           |                |       |                |
| Right Arm                    | 0.26      | 0.21           | 0.03  | 0.90           |
| Left Arm                     | 0.32      | 0.11           | -0.06 | 0.78           |
| Right Leg                    | 0.15      | 0.46           | 0.08  | 0.71           |
| Left Leg                     | -0.01     | 0.97           | -0.15 | 0.46           |
| Vocalization measures        |           |                |       |                |
| Duration                     | -0.26     | 0.20           | -0.07 | 0.74           |
| Mean F <sub>0</sub>          | -0.10     | 0.71           | -0.13 | 0.62           |
| Mean F <sub>1</sub>          | 0.38      | 0.15           | -0.07 | 0.78           |
| Mean F <sub>2</sub>          | -0.22     | 0.42           | 0.00  | 0.99           |
| SD of F <sub>0</sub>         | -0.08     | 0.78           | 0.09  | 0.75           |
| SD of F <sub>1</sub>         | 0.31      | 0.24           | 0.01  | 0.97           |
| SD of F <sub>2</sub>         | 0.08      | 0.77           | 0.38  | 0.14           |

rho: Spearman’s rank correlation coefficient. PSD: power spectrum density. Spearman’s rank correlation coefficients were calculated because the age of days did not fulfill the criteria of normal distribution (Shapiro-Wilk test). SD: standard deviation. F<sub>0</sub>: fundamental frequency, F<sub>1</sub> and F<sub>2</sub>: formant frequencies.
