# Supplementary material for: Precursors of Dancing and Singing to Music in Three- to Four-Months-Old Infants
Source: PubMed Central journal article supplement (PMC4023986; doi:10.1371/journal.pone.0097680), 2014-05-16
Supplement: pone.0097680.s018.pdf [file pone.0097680.s018.pdf]

**Table S4. Correlation between the age of days and the behavioral measures during the music condition “Go Trippy” by WANICO feat. Jake Smith and the silent condition**

| Measures                     | Condition |                |       |                |
|------------------------------|-----------|----------------|-------|----------------|
|                              | Silent    |                | Music |                |
|                              | rho       | <i>p</i> value | rho   | <i>p</i> value |
| Limb-movement measures       |           |                |       |                |
| Mean square sum of velocity  |           |                |       |                |
| Right Arm                    | -0.12     | 0.58           | 0.03  | 0.89           |
| Left Arm                     | -0.13     | 0.55           | 0.03  | 0.91           |
| Right Leg                    | 0.04      | 0.84           | 0.17  | 0.45           |
| Left Leg                     | 0.02      | 0.92           | 0.24  | 0.27           |
| PSD around the musical tempo |           |                |       |                |
| Right Arm                    | 0.19      | 0.39           | 0.17  | 0.45           |
| Left Arm                     | 0.18      | 0.41           | 0.27  | 0.21           |
| Right Leg                    | 0.07      | 0.75           | 0.16  | 0.47           |
| Left Leg                     | -0.13     | 0.55           | 0.03  | 0.88           |
| Vocalization measures        |           |                |       |                |
| Duration                     | -0.38     | 0.07           | -0.28 | 0.19           |
| Mean F <sub>0</sub>          | -0.46     | 0.06           | 0.00  | 0.99           |
| Mean F <sub>1</sub>          | 0.43      | 0.08           | 0.13  | 0.61           |
| Mean F <sub>2</sub>          | -0.14     | 0.59           | 0.07  | 0.78           |
| SD of F <sub>0</sub>         | 0.14      | 0.60           | 0.14  | 0.60           |
| SD of F <sub>1</sub>         | 0.19      | 0.46           | 0.34  | 0.19           |
| SD of F <sub>2</sub>         | -0.10     | 0.69           | 0.08  | 0.76           |

rho: Spearman’s rank correlation coefficient. PSD: power spectrum density. Spearman’s rank correlation coefficients were calculated because the age of days did not fulfill the criteria of normal distribution (Shapiro-Wilk test). SD: standard deviation. F<sub>0</sub>: fundamental frequency, F<sub>1</sub> and F<sub>2</sub>: formant frequencies.
