# Supplementary material for: Precursors of Dancing and Singing to Music in Three- to Four-Months-Old Infants
Source: PubMed Central journal article supplement (PMC4023986; doi:10.1371/journal.pone.0097680), 2014-05-16
Supplement: pone.0097680.s019.pdf [file pone.0097680.s019.pdf]

**Table S5. Proportions of power spectrum density within 0.05-1, 1-2, and 2-3 Hz frequency ranges relative to the total power during the music condition “Everybody” by Backstreet Boys and the silent condition**

|                  | Power Spectrum Density (%) |      |       |      |       |      |
|------------------|----------------------------|------|-------|------|-------|------|
|                  | 0.05-1Hz                   |      | 1-2Hz |      | 2-3Hz |      |
|                  | Mean                       | SD   | Mean  | SD   | Mean  | SD   |
| <b>Right-Arm</b> |                            |      |       |      |       |      |
| Silent           | 91.42                      | 6.20 | 5.71  | 4.05 | 1.85  | 1.63 |
| Music            | 95.26                      | 2.74 | 3.42  | 1.88 | 0.94  | 0.58 |
| <b>Left-Arm</b>  |                            |      |       |      |       |      |
| Silent           | 92.37                      | 5.36 | 5.27  | 4.01 | 1.44  | 0.94 |
| Music            | 95.03                      | 3.77 | 3.54  | 2.72 | 1.00  | 0.76 |
| <b>Right-Leg</b> |                            |      |       |      |       |      |
| Silent           | 92.18                      | 4.27 | 5.63  | 3.20 | 1.38  | 0.78 |
| Music            | 93.68                      | 4.98 | 4.60  | 3.41 | 1.19  | 1.11 |
| <b>Left-Leg</b>  |                            |      |       |      |       |      |
| Silent           | 92.98                      | 5.47 | 5.37  | 4.10 | 1.21  | 1.14 |
| Music            | 92.66                      | 7.60 | 5.67  | 5.88 | 1.17  | 1.14 |

Over the 90% power spectrum density was within 0.05-1Hz frequency range.
