# Supplementary material for: Precursors of Dancing and Singing to Music in Three- to Four-Months-Old Infants
Source: PubMed Central journal article supplement (PMC4023986; doi:10.1371/journal.pone.0097680), 2014-05-16
Supplement: pone.0097680.s020.pdf [file pone.0097680.s020.pdf]

**Table S6. Proportions of power spectrum density within 0.05-1, 1-2, and 2-3 Hz frequency ranges relative to the total power during the music condition “Go Trippy” by WANICO feat. Jake Smith and the silent condition**

|                  | Power Spectrum Density (%) |      |       |      |       |      |
|------------------|----------------------------|------|-------|------|-------|------|
|                  | 0.05-1Hz                   |      | 1-2Hz |      | 2-3Hz |      |
|                  | Mean                       | SD   | Mean  | SD   | Mean  | SD   |
| <b>Right-Arm</b> |                            |      |       |      |       |      |
| Silent           | 91.74                      | 6.35 | 5.50  | 4.23 | 1.73  | 1.48 |
| Music            | 93.78                      | 3.98 | 4.47  | 3.08 | 1.27  | 0.80 |
| <b>Left-Arm</b>  |                            |      |       |      |       |      |
| Silent           | 92.26                      | 5.74 | 5.33  | 4.27 | 1.46  | 1.05 |
| Music            | 93.73                      | 5.53 | 4.44  | 3.95 | 1.36  | 1.30 |
| <b>Right-Leg</b> |                            |      |       |      |       |      |
| Silent           | 92.17                      | 4.46 | 5.60  | 3.34 | 1.38  | 0.82 |
| Music            | 93.68                      | 5.01 | 4.56  | 3.30 | 1.31  | 1.38 |
| <b>Left-Leg</b>  |                            |      |       |      |       |      |
| Silent           | 93.93                      | 4.86 | 4.62  | 3.64 | 1.06  | 1.01 |
| Music            | 95.02                      | 3.79 | 3.80  | 2.73 | 0.89  | 0.89 |

Over the 90% power spectrum density was within 0.05-1Hz frequency range.
