# Supplementary material for: Precursors of Dancing and Singing to Music in Three- to Four-Months-Old Infants
Source: PubMed Central journal article supplement (PMC4023986; doi:10.1371/journal.pone.0097680), 2014-05-16
Supplement: pone.0097680.s021.pdf [file pone.0097680.s021.pdf]

**Table S7. Detailed description of detected 51 moving sections**

| #  | Song      | ID   | Discription of Moving Section |           |      | Data Duration [s] | Data Points | #Beats | Mean Phase       | Synchronization |
|----|-----------|------|-------------------------------|-----------|------|-------------------|-------------|--------|------------------|-----------------|
|    |           |      | Condition                     | Limb      | Axis |                   |             |        | Difference [deg] | Index           |
| 1  | Everybody | ID1  | Music                         | Right Leg | Y    | 8.00              | 480         | 15     | -124.28          | 0.11            |
| 2  | Everybody | ID1  | Music                         | Right Leg | Y    | 4.42              | 265         | 8      | 153.98           | 0.08            |
| 3  | Everybody | ID1  | Music                         | Right Leg | Y    | 4.77              | 286         | 9      | -40.81           | 0.09            |
| 4  | Everybody | ID1  | Music                         | Right Leg | Y    | 5.03              | 302         | 9      | 65.25            | 0.08            |
| 5  | Everybody | ID1  | Music                         | Right Leg | Y    | 3.97              | 238         | 7      | -167.97          | 0.15            |
| 6  | Everybody | ID1  | Music                         | Right Leg | Y    | 3.65              | 219         | 7      | 106.88           | 0.27            |
| 7  | Everybody | ID1  | Music                         | Right Leg | Y    | 4.28              | 257         | 7      | -86.84           | 0.13            |
| 8  | Everybody | ID1  | Music                         | Right Leg | Y    | 3.15              | 189         | 5      | 53.15            | 0.22            |
| 9  | Everybody | ID1  | Music                         | Right Leg | Y    | 3.03              | 182         | 5      | 33.14            | 0.19            |
| 10 | Everybody | ID1  | Music                         | Right Leg | Y    | 3.90              | 234         | 7      | 75.97            | 0.10            |
| 11 | Everybody | ID1  | Music                         | Right Leg | Y    | 5.60              | 336         | 10     | 121.95           | 0.07            |
| 12 | Everybody | ID1  | Music                         | Right Leg | Y    | 3.90              | 234         | 7      | -25.41           | 0.41            |
| 13 | Everybody | ID1  | Music                         | Right Leg | Y    | 3.07              | 184         | 6      | 13.77            | 0.34            |
| 14 | Everybody | ID1  | Music                         | Right Leg | Y    | 3.72              | 223         | 0      | 151.37           | 0.02            |
| 15 | Everybody | ID1  | Music                         | Left Leg  | X    | 3.05              | 183         | 6      | 178.06           | 0.06            |
| 16 | Everybody | ID3  | Music                         | Right arm | Y    | 3.17              | 190         | 6      | 174.06           | 0.02            |
| 17 | Everybody | ID9  | Music                         | Left Leg  | Y    | 3.42              | 205         | 6      | -105.41          | 0.04            |
| 18 | Everybody | ID20 | Music                         | Right Leg | X    | 3.62              | 217         | 7      | -65.18           | 0.12            |
| 19 | Everybody | ID25 | Music                         | Left arm  | Y    | 6.10              | 366         | 11     | -138.23          | 0.06            |
| 20 | Everybody | ID25 | Music                         | Left arm  | Y    | 4.77              | 286         | 9      | -110.56          | 0.26            |
| 21 | Everybody | ID25 | Music                         | Left arm  | Y    | 3.20              | 192         | 6      | -23.60           | 0.21            |
| 22 | Everybody | ID26 | Music                         | Left arm  | X    | 3.20              | 192         | 6      | -161.89          | 0.04            |
| 23 | Everybody | ID26 | Music                         | Left Leg  | Y    | 4.05              | 243         | 7      | 14.43            | 0.03            |
| 24 | Go Trippy | ID10 | Music                         | Right arm | Y    | 3.12              | 187         | 2      | -8.09            | 0.05            |
| 25 | Go Trippy | ID13 | Music                         | Right Leg | Z    | 3.07              | 184         | 7      | -176.05          | 0.03            |
| 26 | Go Trippy | ID25 | Music                         | Left arm  | X    | 3.58              | 215         | 8      | 144.25           | 0.06            |
| 27 | Go Trippy | ID25 | Music                         | Left arm  | Y    | 3.30              | 198         | 7      | 56.94            | 0.04            |
| 28 | Everybody | ID3  | Silent                        | Right arm | Y    | 3.25              | 195         | 6      | 139.10           | 0.04            |
| 29 | Everybody | ID9  | Silent                        | Left Leg  | X    | 5.30              | 318         | 10     | -85.54           | 0.03            |
| 30 | Everybody | ID21 | Silent                        | Right arm | X    | 3.48              | 209         | 6      | 101.04           | 0.07            |
| 31 | Everybody | ID21 | Silent                        | Left Leg  | X    | 3.85              | 231         | 7      | -134.85          | 0.09            |
| 32 | Everybody | ID21 | Silent                        | Left Leg  | X    | 5.45              | 327         | 10     | -55.26           | 0.08            |
| 33 | Everybody | ID21 | Silent                        | Left Leg  | X    | 10.22             | 613         | 19     | 53.58            | 0.04            |
| 34 | Everybody | ID21 | Silent                        | Left Leg  | X    | 3.15              | 189         | 6      | 33.30            | 0.09            |
| 35 | Everybody | ID22 | Silent                        | Left arm  | Y    | 3.12              | 187         | 5      | 55.03            | 0.02            |
| 36 | Everybody | ID23 | Silent                        | Right Leg | Z    | 4.62              | 277         | 8      | 92.48            | 0.04            |
| 37 | Everybody | ID25 | Silent                        | Left arm  | Y    | 3.58              | 215         | 6      | -162.14          | 0.07            |
| 38 | Everybody | ID25 | Silent                        | Left arm  | Y    | 3.43              | 206         | 6      | -23.71           | 0.21            |
| 39 | Everybody | ID25 | Silent                        | Left arm  | Y    | 3.53              | 212         | 7      | 97.00            | 0.04            |
| 40 | Everybody | ID25 | Silent                        | Left arm  | X    | 4.78              | 287         | 9      | -36.32           | 0.04            |
| 41 | Go Trippy | ID9  | Silent                        | Left Leg  | X    | 5.30              | 318         | 12     | 20.15            | 0.03            |
| 42 | Go Trippy | ID21 | Silent                        | Right arm | X    | 3.48              | 209         | 8      | -42.86           | 0.06            |
| 43 | Go Trippy | ID21 | Silent                        | Left Leg  | X    | 3.85              | 231         | 9      | -32.69           | 0.06            |
| 44 | Go Trippy | ID21 | Silent                        | Left Leg  | X    | 5.45              | 327         | 12     | -40.01           | 0.05            |
| 45 | Go Trippy | ID21 | Silent                        | Left Leg  | X    | 10.22             | 613         | 22     | 21.26            | 0.02            |
| 46 | Go Trippy | ID21 | Silent                        | Left Leg  | X    | 3.15              | 189         | 6      | -26.89           | 0.06            |
| 47 | Go Trippy | ID22 | Silent                        | Left arm  | Y    | 3.12              | 187         | 7      | -119.04          | 0.02            |
| 48 | Go Trippy | ID25 | Silent                        | Left arm  | Y    | 3.58              | 215         | 8      | -131.98          | 0.05            |
| 49 | Go Trippy | ID25 | Silent                        | Left arm  | Y    | 3.43              | 206         | 8      | -176.46          | 0.07            |
| 50 | Go Trippy | ID25 | Silent                        | Left arm  | Y    | 3.53              | 212         | 8      | 69.58            | 0.03            |
| 51 | Go Trippy | ID25 | Silent                        | Left arm  | X    | 4.78              | 287         | 10     | 17.18            | 0.03            |

Data points: the number of total data points in the limb-position time series in the moving section. #Beats: the number of beats in the moving section which indicates zero in the music condition when detected after the end of music. In the silent condition, synchronization was assessed by using a “virtual” musical beat extracted from the auditory stimulus in the music condition (see Methods for detail, the column of Song in the silent condition indicates which stimulus was used to add the virtual musical beat). The moving sections of ID1 and ID25 in the music condition are high-lighted in yellow.
